# Supplementary material for: Circulating miRNA-21-5p as a diagnostic biomarker for pancreatic cancer: evidence from comprehensive miRNA expression profiling analysis and clinical validation
Source: PubMed Central journal article supplement (PMC5431820; doi:10.1038/s41598-017-01904-z), 2017-05-10
Supplement: 41598_2017_1904_MOESM1_ESM.pdf [file 41598_2017_1904_MOESM1_ESM.pdf]

**Circulating miRNA-21-5p as a diagnostic biomarker for pancreatic cancer: evidence from comprehensive miRNA expression profiling analysis and clinical validation**

**Running title:** *Circulating miRNA-21-5p in PC diagnosis*

Kai Qu <sup>1,#</sup>, Xing Zhang <sup>1,#</sup>, Ting Lin <sup>1,#</sup>, Tian Liu <sup>2</sup>, Zhixin Wang <sup>3</sup>, Sushun Liu <sup>4</sup>, Lei Zhou <sup>5</sup>, Jichao Wei <sup>6</sup>, Hulin Chang <sup>7</sup>, Ke Li <sup>8</sup>, Zheng Wang <sup>1</sup>, Chang Liu <sup>1,\*</sup>, Zheng Wu <sup>1,\*</sup>

**For correspondence:**

**Zheng Wu**, Ph.D., M.D.,

Address: Department of Hepatobiliary Surgery, The First Affiliated Hospital of Xi'an Jiaotong University, Xi'an 710061, China. Email: wuzheng@126.com. Telephone: +86-29-85323895. Fax number: +86-29-85324695.

or **Chang Liu**, Ph.D., M.D.,

Address: Department of Hepatobiliary Surgery, The First Affiliated Hospital of Xi'an Jiaotong University, Xi'an 710061, China. Email: liuchangdoctor@163.com. Telephone: +86-29-85323900. Fax number: +86-29-85324695.

## **Supplementary Figure Legends**

**Figure S1** Flow diagram of search strategy and study selection for RRA analysis.

**Figure S2** Kaplan–Meier analysis of overall survival for patients with different meta-signature miRNA expression levels.

**Figure S3** Expression correlation between serum and tissue has-miR-21-5p.

**Figure S4** Flow diagram of search strategy and study selection for diagnostic meta-analysis.

**Figure S5** Sensitivity analysis of miR-21-5p in PC. (A) goodness-of-fit; (B) bivariate normality; (C) influence analysis; (D) outlier detection.

**Figure S6** Funnel graph for the assessment of potential publication bias for studies of miR-21-5p.

**Figure S7** Forest plots showing the sensitivity and specificity of miR-21-5p in Asian subgroup. (A) Forest plot showing the sensitivity of miR-21-5p in the diagnosis of PC. (B) Forest plot showing the specificity of miR-21-5p in the diagnosis of PC.

**Figure S8** Forest plots showing the sensitivity and specificity of miR-21-5p in blood sample subgroup. (A) Forest plot showing the sensitivity of miR-21-5p in the diagnosis of PC. (B) Forest plot showing the specificity of miR-21-5p in the diagnosis of PC.

**Figure S9** Forest plots showing the sensitivity and specificity of miR-21-5p in healthy volunteer subgroup. (A) Forest plot showing the sensitivity of miR-21-5p in the diagnosis of PC. (B) Forest plot showing the specificity of

miR-21-5p in the diagnosis of PC.

**Figure S10** Forest plots showing the sensitivity and specificity of miR-21-5p in patients with benign diseases. (A) Forest plot showing the sensitivity of miR-21-5p in the diagnosis of PC. (B) Forest plot showing the specificity of miR-21-5p in the diagnosis of PC.

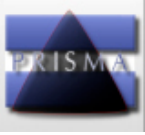

# PRISMA 2009 Flow Diagram

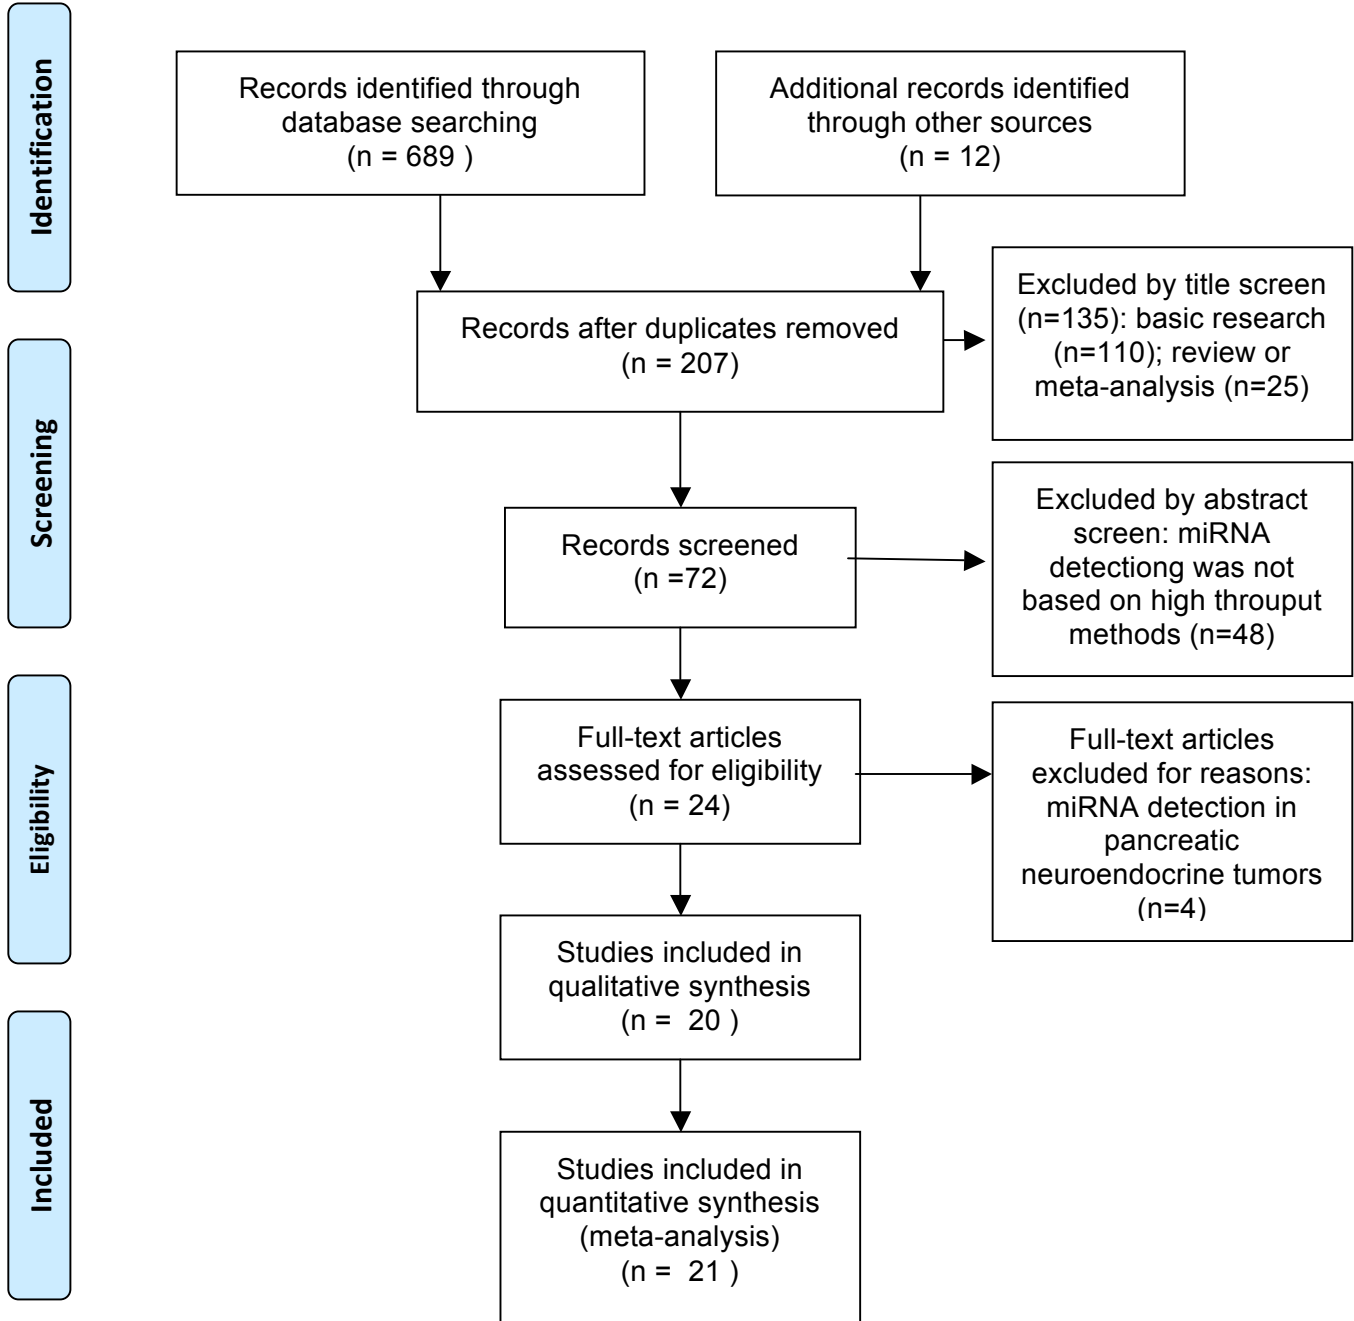

From: Moher D, Liberati A, Tetzlaff J, Altman DG, The PRISMA Group (2009). Preferred Reporting Items for Systematic Reviews and Meta-Analyses: The PRISMA Statement. PLoS Med 6(6): e1000097. doi:10.1371/journal.pmed1000097

For more information, visit [www.prisma-statement.org](http://www.prisma-statement.org).

Pancreatic cancer (TCGA dataset, n=55)

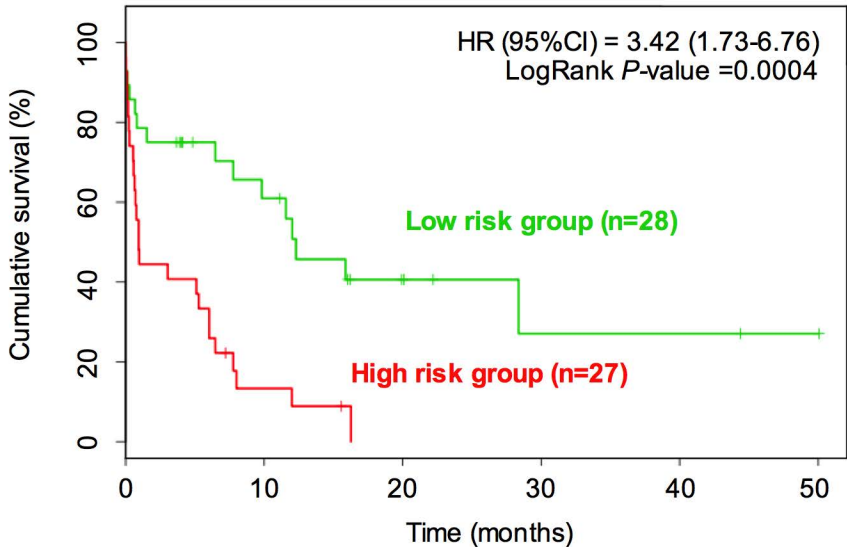

# Expression correlation between serum and tissue samples

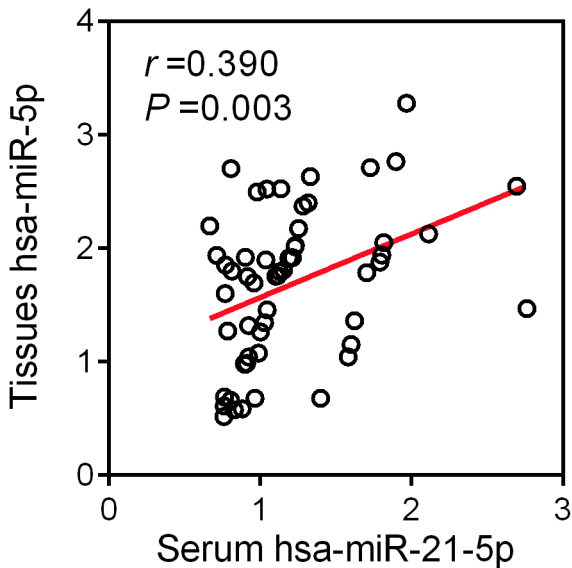



# PRISMA 2009 Flow Diagram

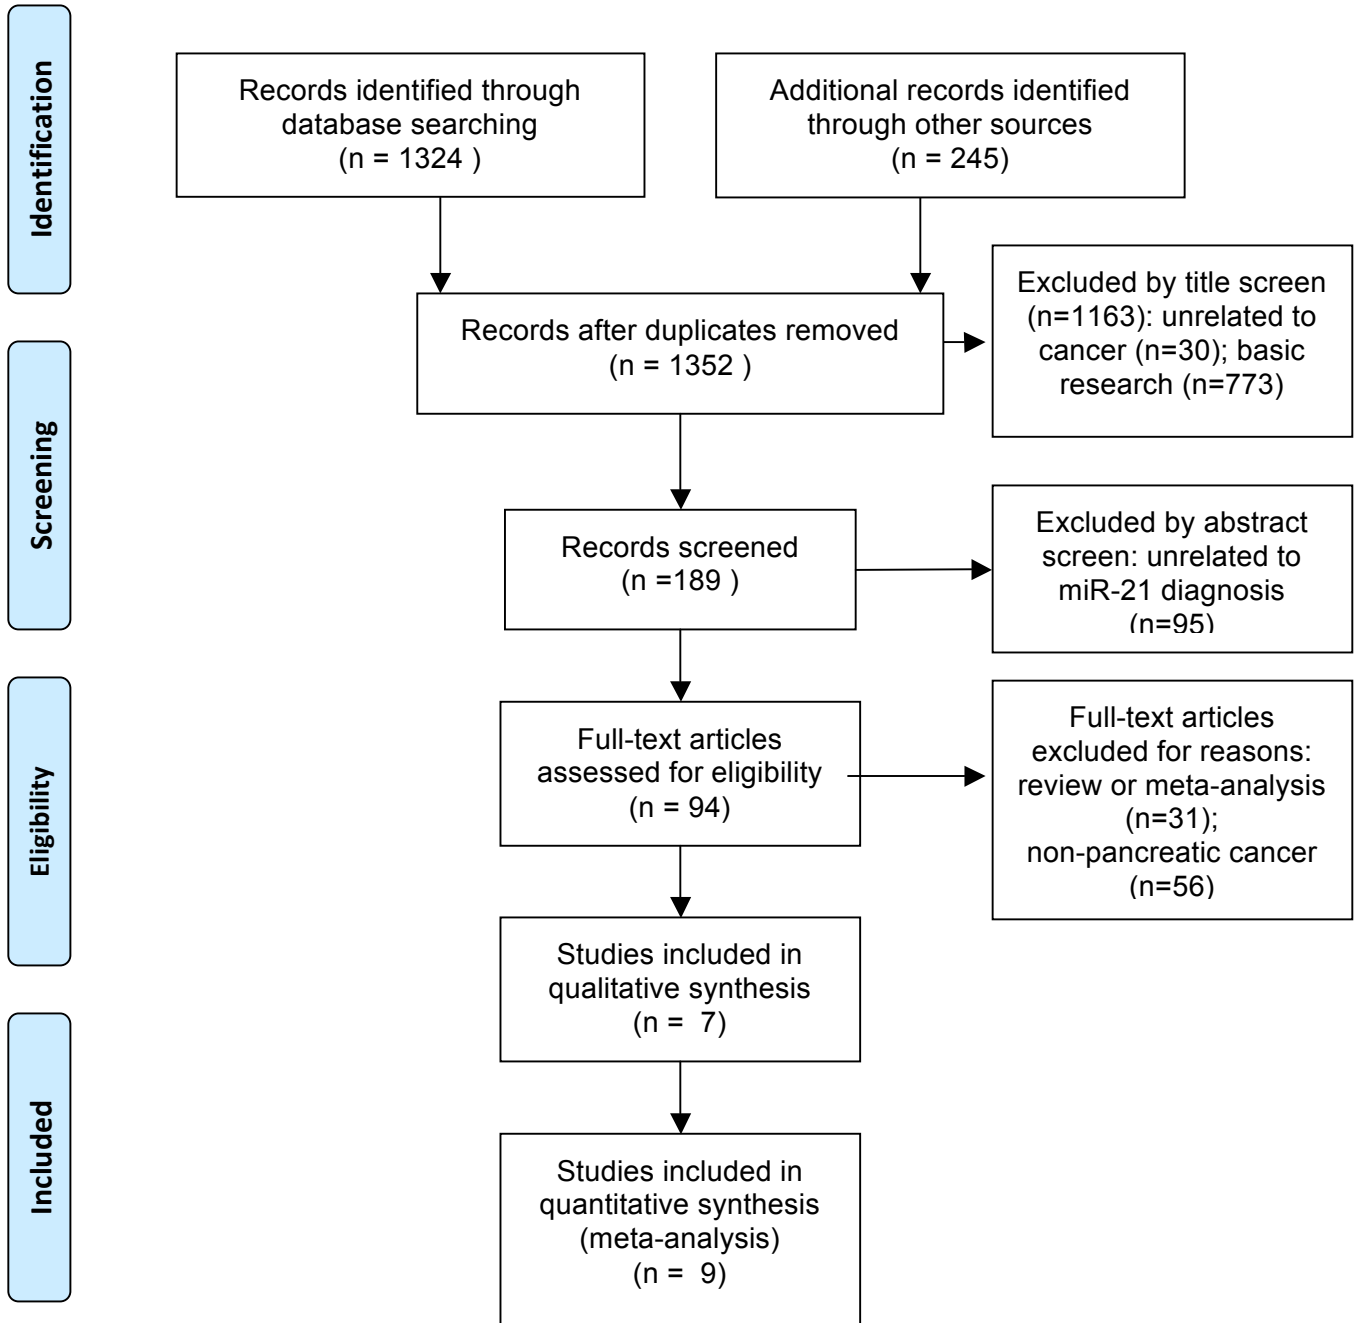

From: Moher D, Liberati A, Tetzlaff J, Altman DG, The PRISMA Group (2009). Preferred Reporting Items for Systematic Reviews and Meta-Analyses: The PRISMA Statement. PLoS Med 6(6): e1000097. doi:10.1371/journal.pmed1000097

For more information, visit [www.prisma-statement.org](http://www.prisma-statement.org).

(a) Goodness-Of-Fit

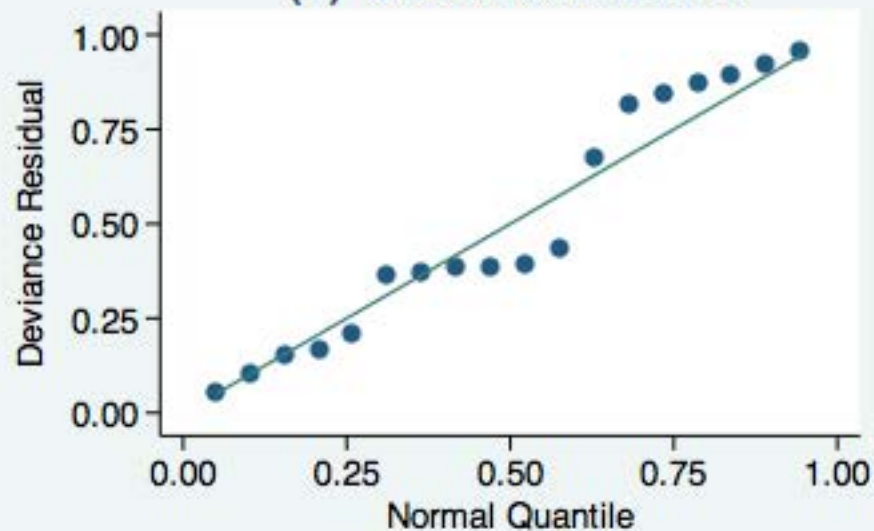

(b) Bivariate Normality

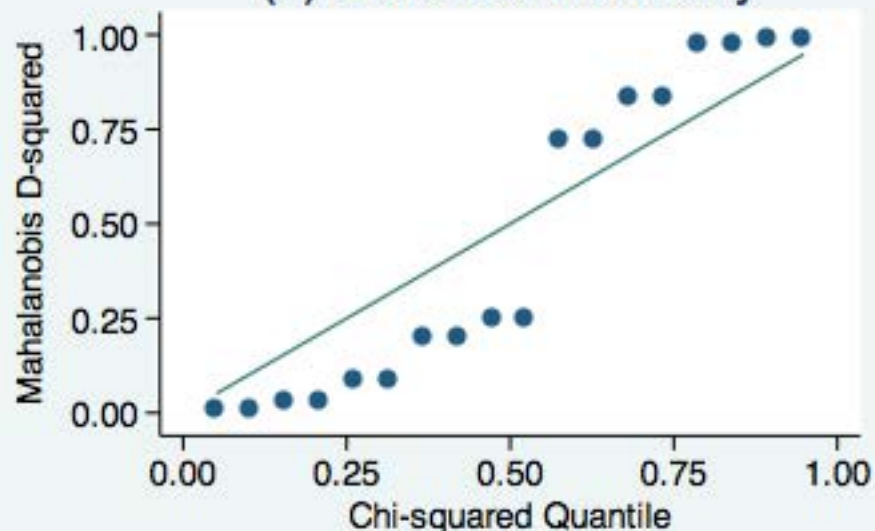

(c) Influence Analysis

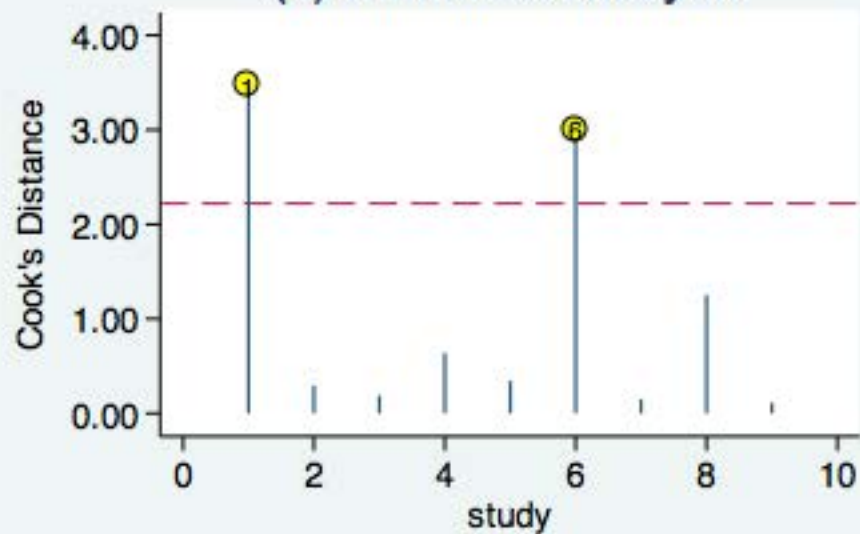

(d) Outlier Detection

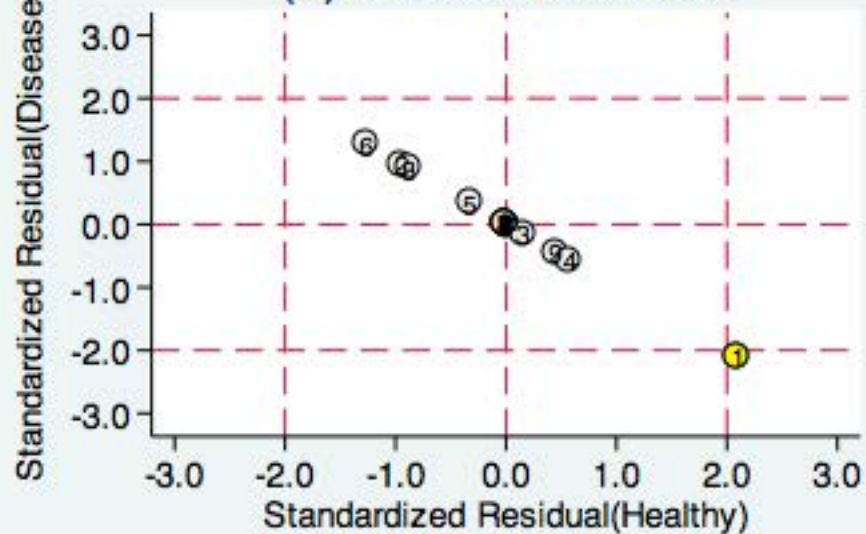



Deeks' Funnel Plot Asymmetry Test  
pvalue = 0.15

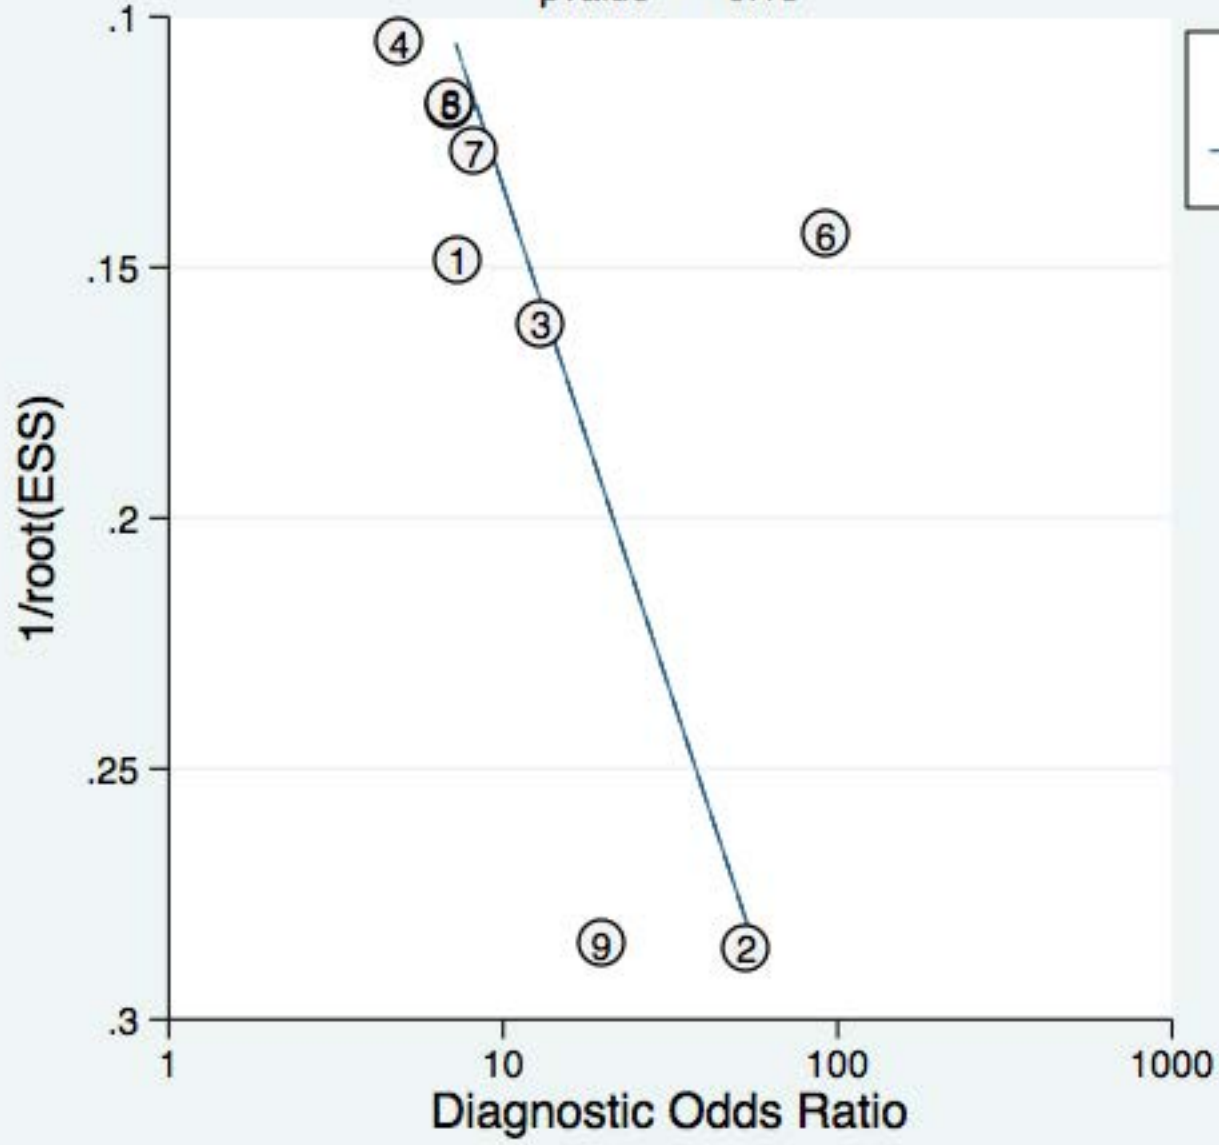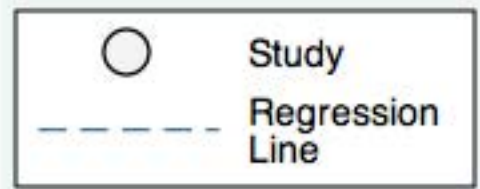

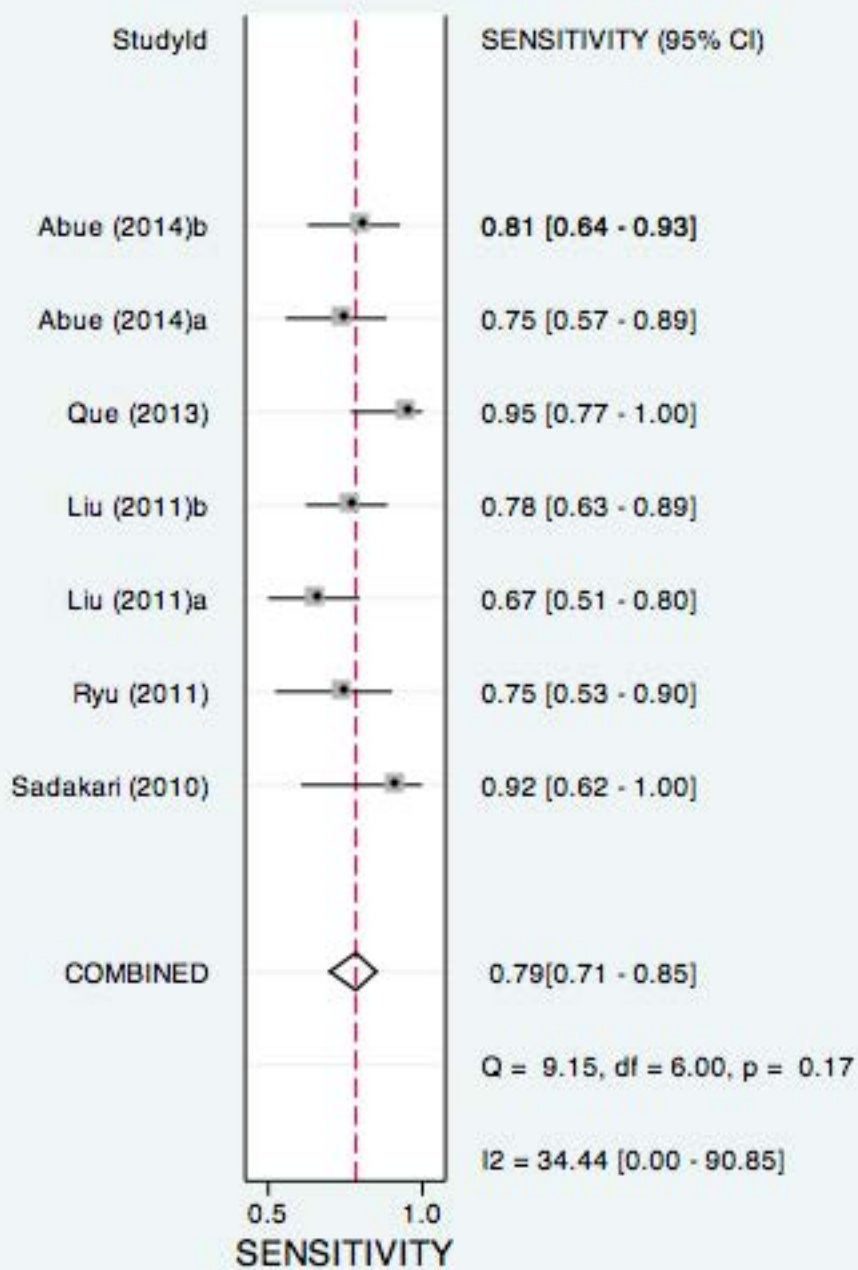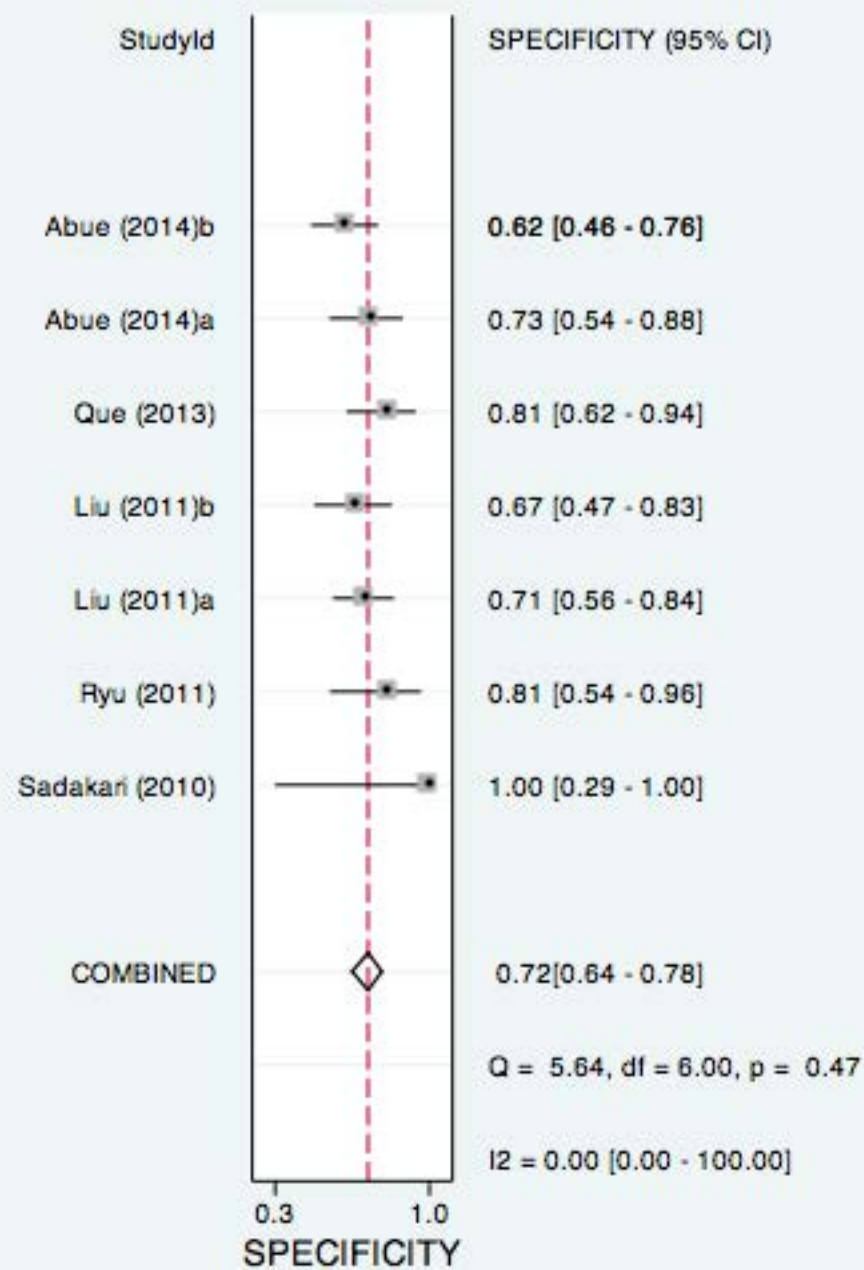

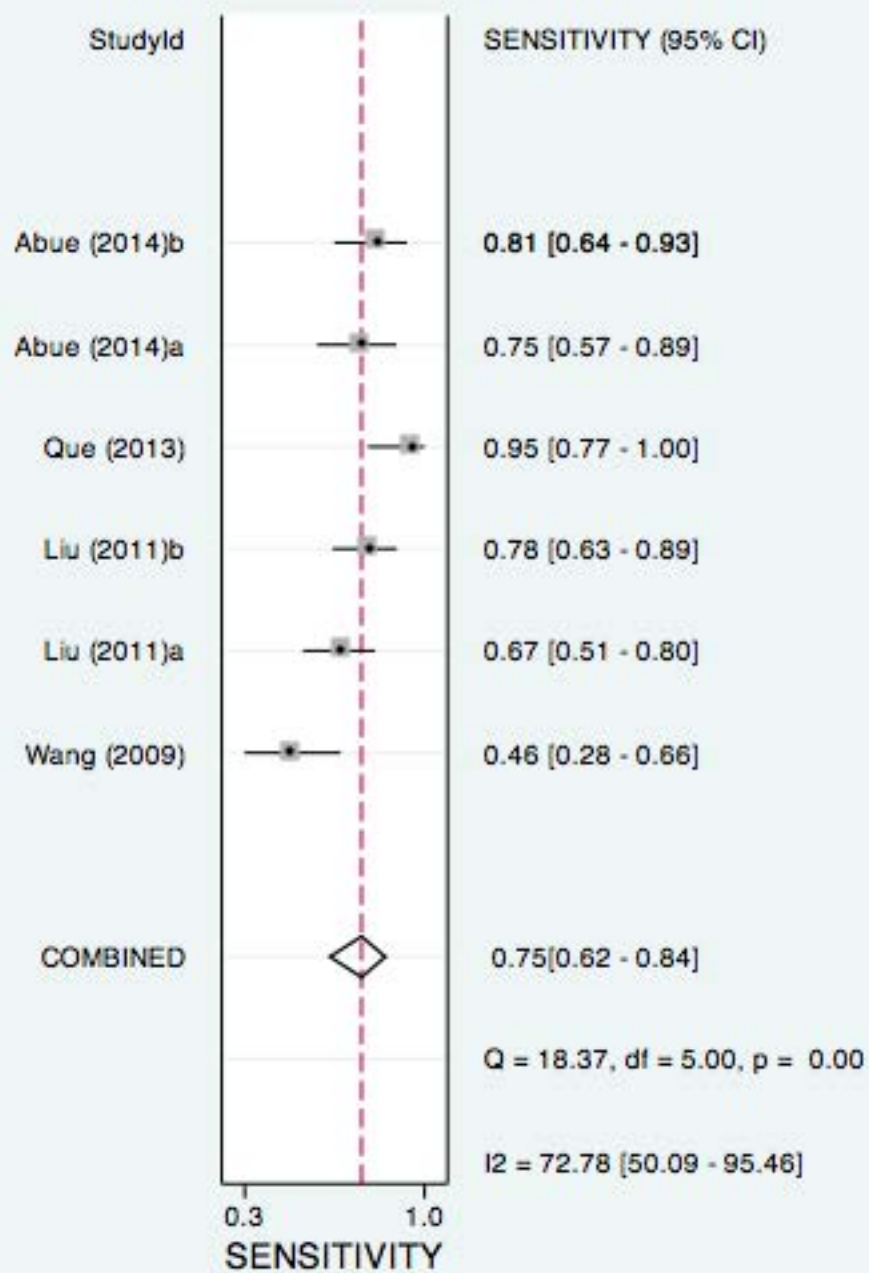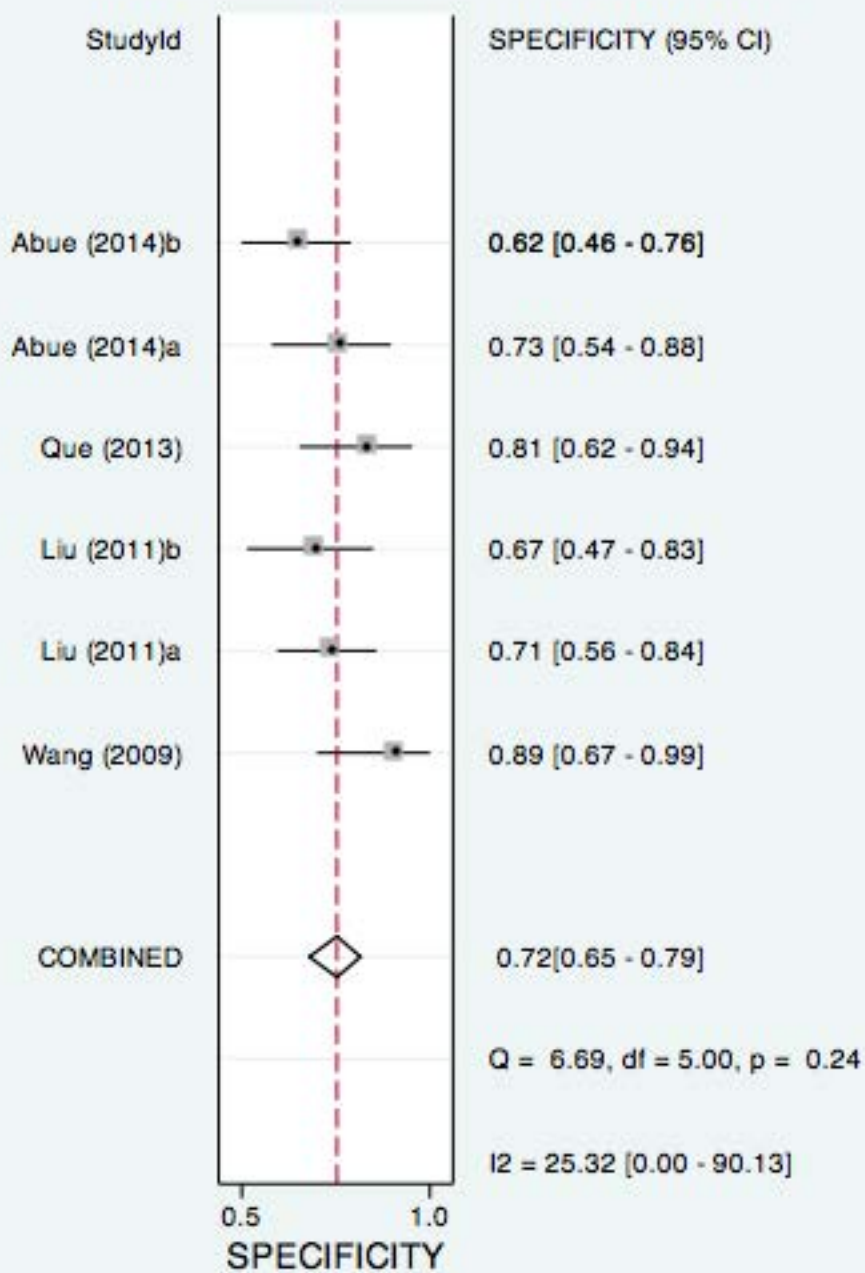

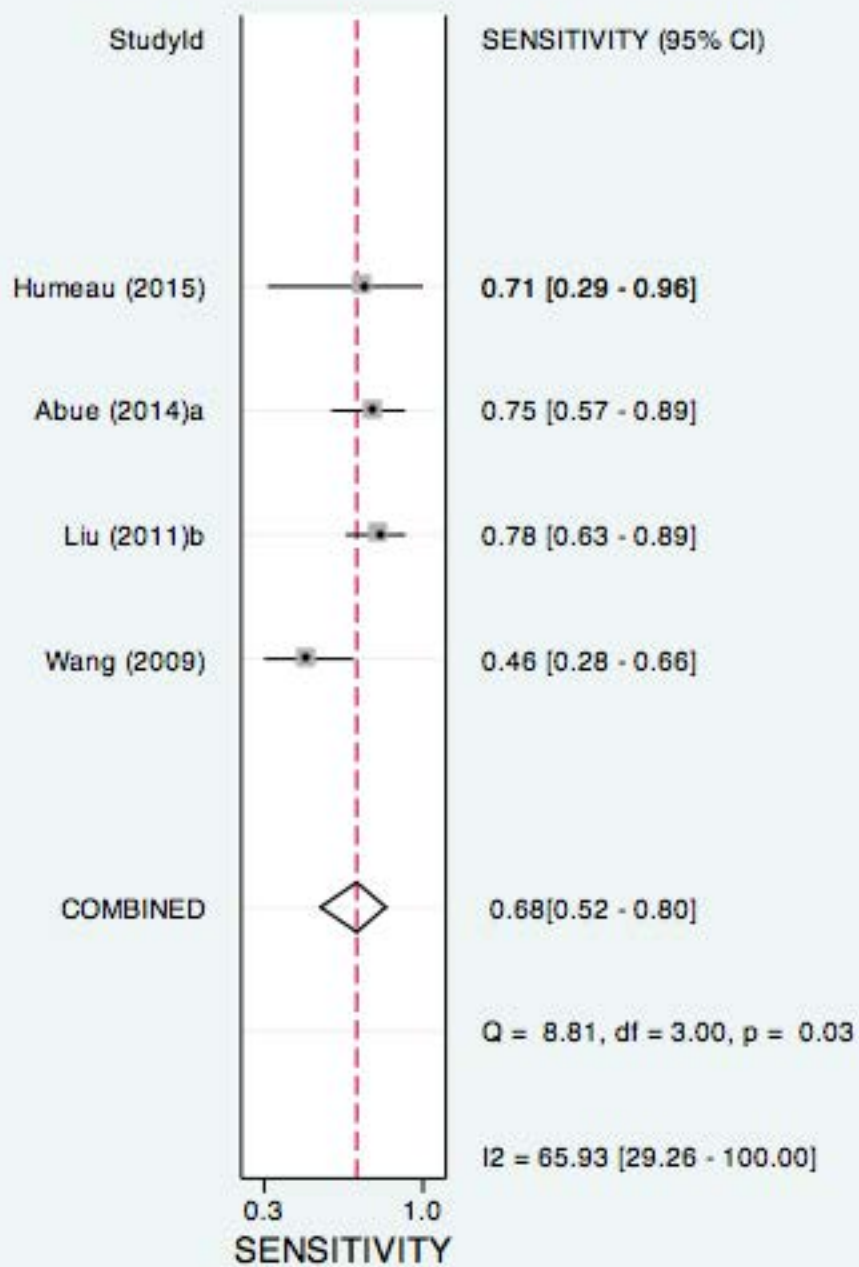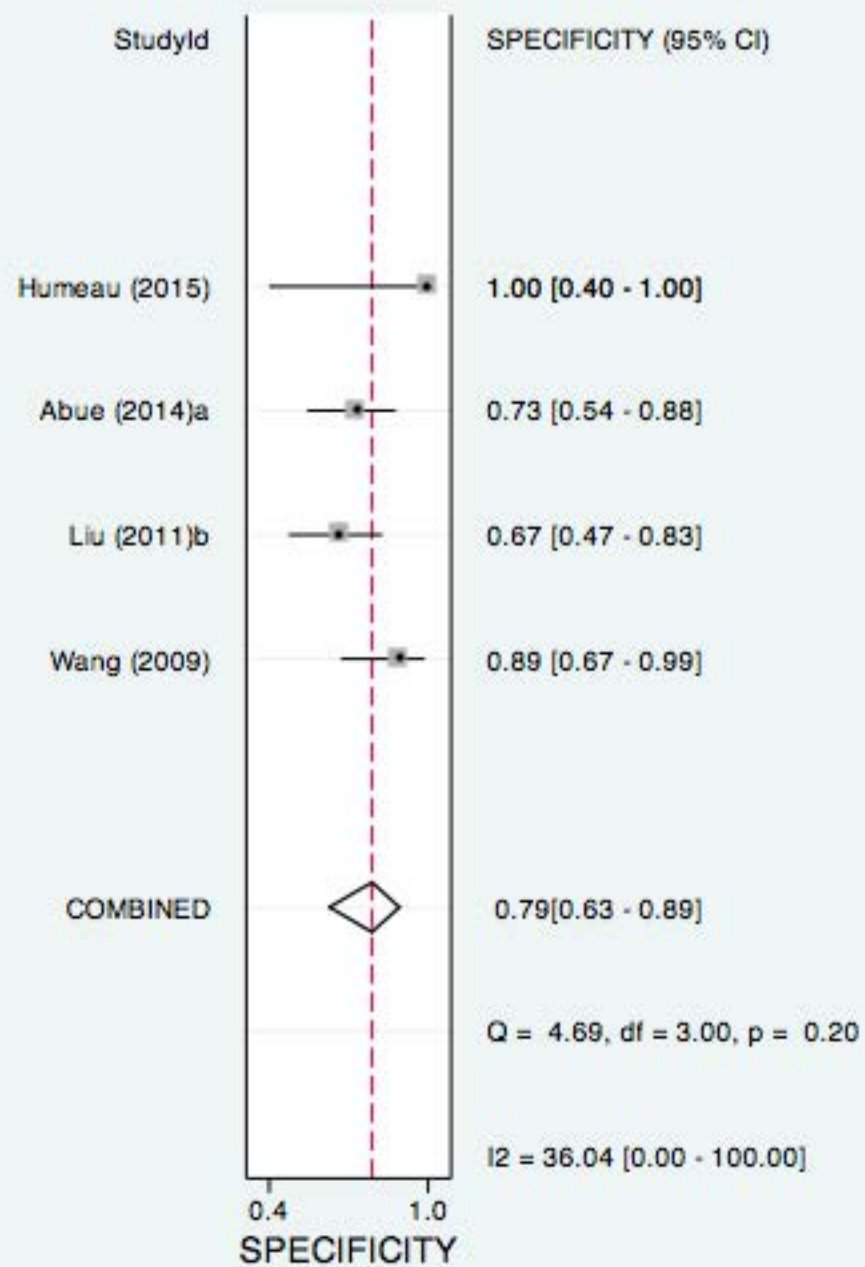

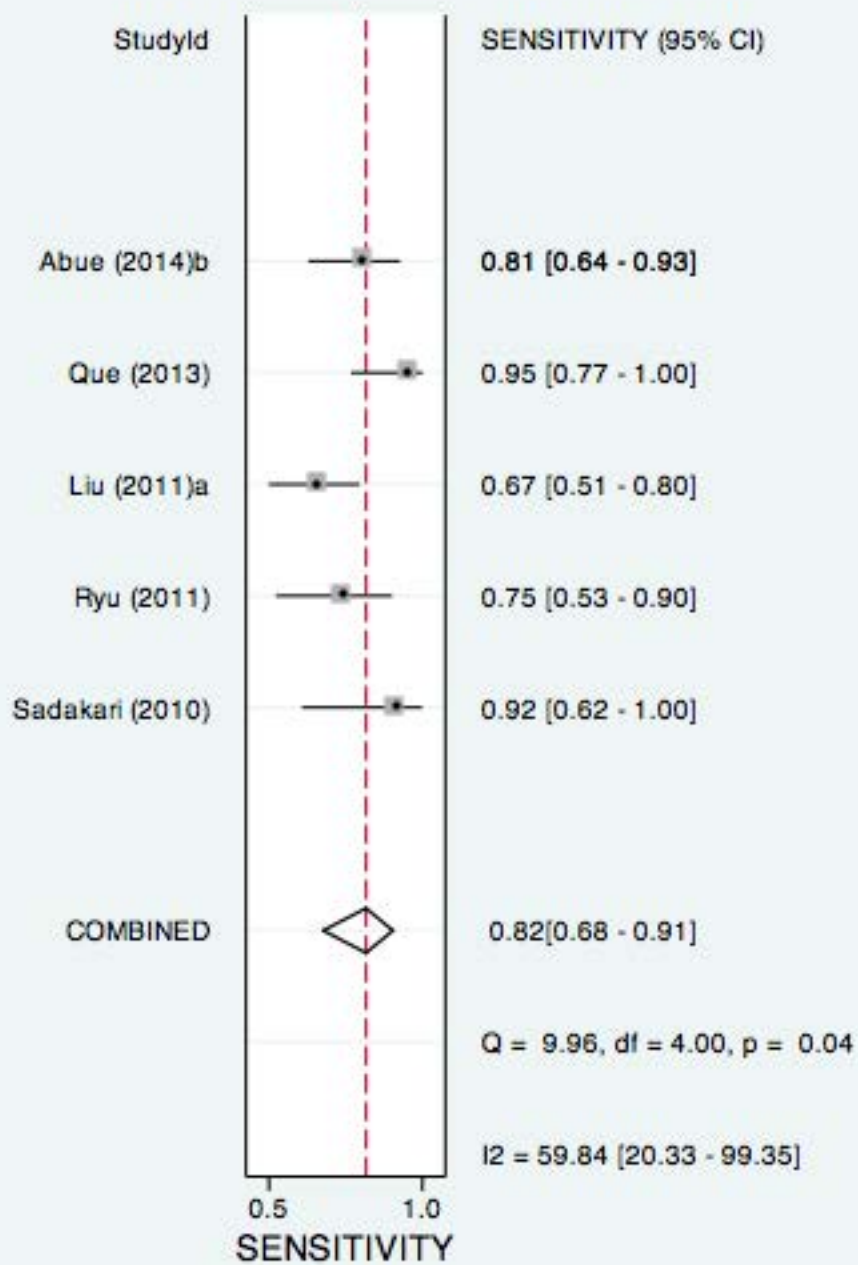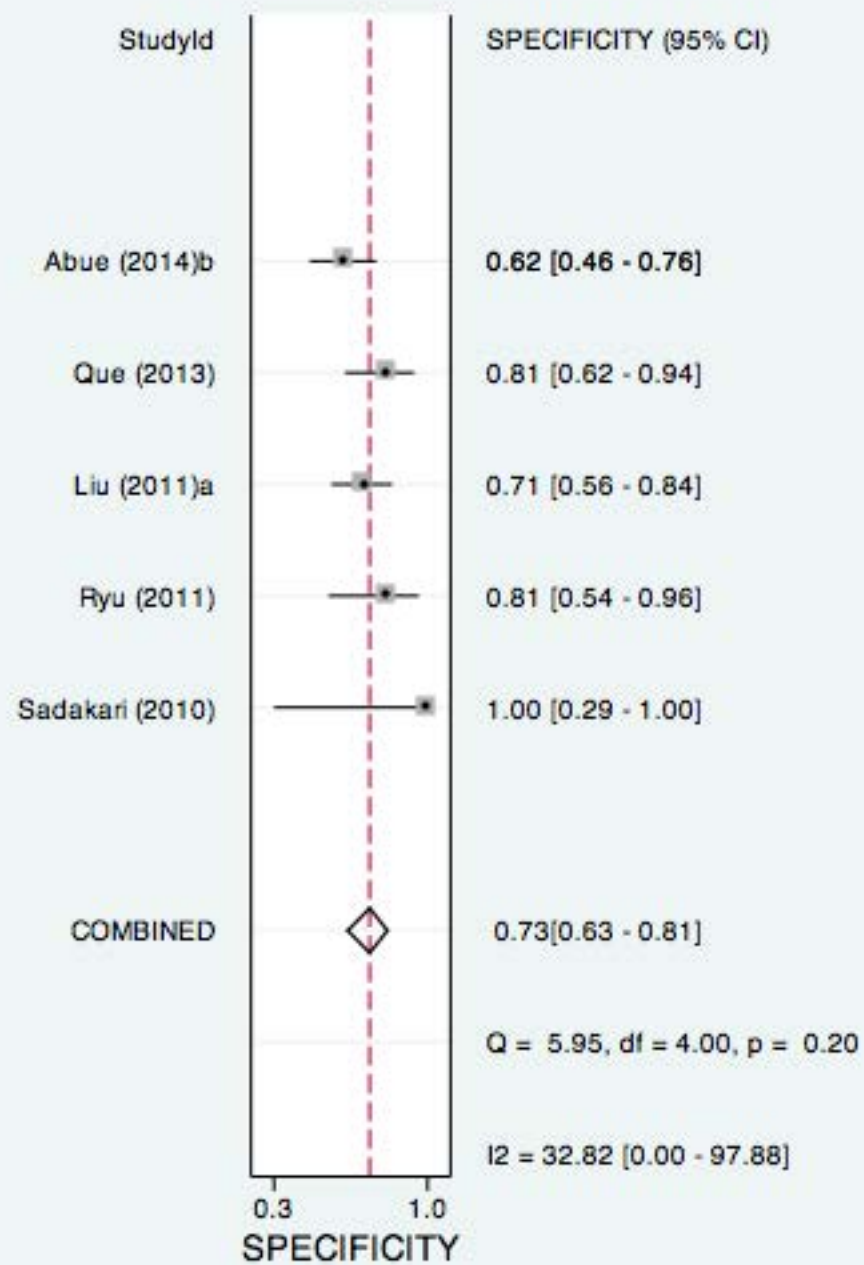

**Table S1 Clinicopathological characteristics of patients in validation groups**

| <b>Variables</b>                  |                         |
|-----------------------------------|-------------------------|
| Age, median (range), yr           | 52 (45-71) <sup>a</sup> |
| Gender                            |                         |
| Male                              | 58 (61.1%)              |
| Female                            | 37 (38.9%)              |
| Tumor size                        |                         |
| ≥ 2cm                             | 50 (52.6%)              |
| < 2cm                             | 45 (47.4%)              |
| Histology                         |                         |
| Poorly differentiated             | 47 (49.5%)              |
| Well or moderately differentiated | 48 (50.5%)              |
| Tumor Grade (UICC)                |                         |
| Stage I-IIA                       | 41 (43.2%)              |
| Stage IIB-IV                      | 54 (56.8%)              |
| Resection margin status           |                         |
| R0                                | 41 (43.2%)              |
| R1                                | 54 (56.8%)              |

a. Data is presented as mean and range

**Table S2 Characteristics of analyzed datasets**

| Author (year)     | Country | Ethnicity | Period          | No. of sample (T/N) | Tissue type   | Control source                                             | High-throughput method                                                     | Total miRNAs | Cut-off criteria |
|-------------------|---------|-----------|-----------------|---------------------|---------------|------------------------------------------------------------|----------------------------------------------------------------------------|--------------|------------------|
| Bloomston (2007)  | USA     | Caucasian | 2000.01-2005.12 | 65/42               | Frozen tissue | Chronic pancreatitis tissues                               | Custom miRNA microarray chips                                              | 326          | FC>2             |
| Lee (2007)        | USA     | Caucasian | NA              | 28/6                | Frozen tissue | Normal pancreas tissues                                    | qRT-PCR using TaqMan microRNA Assays                                       | 222          | p<0.01           |
| Szafranska (2007) | Germany | Caucasian | NA              | 10/7                | Frozen tissue | Normal pancreas tissues                                    | Custom miRNA microarray chips                                              | 281          | p<0.05           |
| Zhang (2009)      | USA     | Caucasian | NA              | 17/18               | Frozen tissue | Adjacent non-tumorous tissues                              | qRT-PCR using QuantiMir System                                             | 95           | FC>3.3           |
| Hao (2011)        | China   | Asian     | 2009-2011       | 40/40               | Frozen tissue | Adjacent non-tumorous tissues                              | qRT-PCR using TaqMan microRNA Assays                                       | 71           | p<0.05           |
| Zhang (2011)      | China   | Asian     | 2009-2012       | 20/20               | Frozen tissue | Adjacent non-tumorous tissues                              | miRCURY LNA human microRNA Array                                           | 1200         | p<0.05           |
| Ali (2012)        | USA     | Caucasian | NA              | 15/15               | FFPE tissue   | Adjacent non-tumorous tissues                              | qRT-PCR using SYBR Green miRNA-based assay                                 | 228          | NA               |
| Bauer (2012)      | Germany | Caucasian | NA              | 94/16               | Frozen tissue | Chronic pancreatitis tissues                               | Geniom biochip miRNA homo sapiens                                          | 863          | p<0.05           |
| Jamieson (2012)   | UK      | Caucasian | NA              | 48/10               | Frozen tissue | Adjacent non-tumorous tissues                              | Agilent's Human miRNA Microarray                                           | 723          | p<0.001          |
| Munding (2012)    | Germany | Caucasian | NA              | 57/48               | FFPE tissue   | Chronic pancreatitis tissues                               | Agilent Human microRNA Microarray v2.0                                     | 719          | p<0.05           |
| Nagao (2012)      | Japan   | Asian     | NA              | 65/65               | Frozen tissue | Adjacent non-tumorous tissues                              | 3D-Gene miRNA microarray platform and qRT-PCR using TaqMan microRNA Assays | 900          | FC>2             |
| Piepoli (2012)    | Italy   | Caucasian | NA              | 17/17               | Frozen tissue | Adjacent non-tumorous tissues                              | GeneChip miRNA Array                                                       | 846          | p<0.01           |
| Schultz (2012)    | Denmark | Caucasian | 1976-2008       | 160/51              | Frozen tissue | Chronic pancreatitis (23) and normal pancreas tissues (28) | TaqMans Array Human MicroRNA A+B Cards v2.0                                | 664          | p<0.05           |
| Yu (2012)a        | USA     | Caucasian | NA              | 34/15               | Frozen tissue | Normal pancreas tissues                                    | TaqMans Array Human MicroRNA A+B Cards                                     | 735          | FC>2             |
| Yu (2012)b        | USA     | Caucasian | NA              | 11/15               | Frozen tissue | Normal pancreas tissues                                    | TaqMans Array Human MicroRNA A+B Cards                                     | 735          | FC>2             |
| Lubezky (2013)    | Israel  | Caucasian | 2002.02-2011    | 45/10               | Frozen tissue | Normal pancreas tissues                                    | GeneChip miRNA Array                                                       | 846          | p<0.05           |
| Zhao (2013)       | China   | Asian     | 2008.01-2010.06 | 10/10               | Frozen tissue | Adjacent non-tumorous tissues                              | Agilent Human microRNA Microarray                                          | 713          | p<0.05           |

|                |       |           |                 |        |               |                               |                                   |      |        |
|----------------|-------|-----------|-----------------|--------|---------------|-------------------------------|-----------------------------------|------|--------|
| Collins (2014) | USA   | Caucasian | 1993-2007       | 9/9    | Frozen tissue | Adjacent non-tumorous tissues | nanoString nCounter platform      | 326  | p<0.01 |
| Hong (2014)    | Korea | Asian     | 2013.01-2013.08 | 11/11  | Frozen tissue | Adjacent non-tumorous tissues | miRCURY LNA human microRNA Array  | 3100 | p<0.05 |
| Zhang (2014)   | China | Asian     | NA              | 9/3    | Frozen tissue | Adjacent non-tumorous tissues | Agilent Human microRNA Microarray | 713  | p<0.05 |
| Kojima (2015)  | Japan | Asian     | 2010-2012       | 100/21 | Frozen tissue | Normal pancreas tissues       | 3D-Gene miRNA microarray platform | 2555 | p<0.01 |

---

FFPE, formalin-fixed paraffin-embedded; FC, fold change; NA, not available.



**Table S3 Validated targets of seven differentially expressed miRNAs in pancreatic cancer.**

| miR-21-5p       | miR-31-5p      | miR-210-3p      | miR-155-5p     | miR-217          | miR-148a-3p     | miR-375         |
|-----------------|----------------|-----------------|----------------|------------------|-----------------|-----------------|
| <i>RASGRP1</i>  | <i>RHOA</i>    | <i>HOXA9</i>    | <i>UQCRFS1</i> | <i>SIRT1</i>     | <i>DNMT1</i>    | <i>TIMM8A</i>   |
| <i>CDC25A</i>   | <i>PPP2R2A</i> | <i>TP53I11</i>  | <i>MEIS1</i>   | <i>ROBO1</i>     | <i>HLA-G</i>    | <i>MTPN</i>     |
| <i>BCL2</i>     | <i>LATS2</i>   | <i>PIM1</i>     | <i>TAB2</i>    | <i>PTEN</i>      | <i>TGIF2</i>    | <i>PDK1</i>     |
| <i>TM9SF3</i>   | <i>SATB2</i>   | <i>HOXA1</i>    | <i>MECP2</i>   | <i>FHIT</i>      | <i>DNMT3B</i>   | <i>USP1</i>     |
| <i>RTN4</i>     | <i>FOXP3</i>   | <i>FGFRL1</i>   | <i>SOCS1</i>   | <i>KRAS</i>      | <i>NR1I2</i>    | <i>JAK2</i>     |
| <i>PLOD3</i>    | <i>WASF3</i>   | <i>RAD52</i>    | <i>MSH6</i>    | <i>NR4A2</i>     | <i>RPS6KA5</i>  | <i>ADIPOR2</i>  |
| <i>NCAPG</i>    | <i>YY1</i>     | <i>NPTX1</i>    | <i>MSH2</i>    | <i>EZH2</i>      | <i>CCKBR</i>    | <i>C1QBP</i>    |
| <i>DERL1</i>    | <i>RET</i>     | <i>EFNA3</i>    | <i>MLH1</i>    | <i>TRAPPC2P1</i> | <i>IRS1</i>     | <i>YAP1</i>     |
| <i>BASP1</i>    | <i>NUMB</i>    | <i>CASP8AP2</i> | <i>INPP5D</i>  | <i>PPM1D</i>     | <i>ACVR1</i>    | <i>PLAG1</i>    |
| <i>JAG1</i>     | <i>NFAT5</i>   | <i>PTPN1</i>    | <i>DET1</i>    | <i>SMAD7</i>     | <i>BCL2</i>     | <i>MTDH</i>     |
| <i>REST</i>     | <i>KLF13</i>   | <i>BDNF</i>     | <i>SMAD5</i>   | <i>E2F3</i>      | <i>TMED7</i>    | <i>RASD1</i>    |
| <i>SMARCA4</i>  | <i>JAZF1</i>   | <i>XIST</i>     | <i>HIVEP2</i>  | <i>DACH1</i>     | <i>PBXIP1</i>   | <i>YY1AP1</i>   |
| <i>SPRY2</i>    | <i>HOXC13</i>  | <i>CPEB2</i>    | <i>ZNF652</i>  | <i>FOXO3</i>     | <i>CDC25B</i>   | <i>ELAVL4</i>   |
| <i>DUSP10</i>   | <i>ETS1</i>    | <i>GPD1L</i>    | <i>ZIC3</i>    | <i>GPC5</i>      | <i>MMP7</i>     | <i>SP1</i>      |
| <i>TIMP3</i>    | <i>ITGA5</i>   | <i>ISCU</i>     | <i>BACH1</i>   | <i>SIRT1</i>     | <i>WNT10B</i>   | <i>MAP3K8</i>   |
| <i>SOX5</i>     | <i>MPRIP</i>   | <i>NCAM1</i>    | <i>Arntl</i>   |                  | <i>CDKN1B</i>   | <i>FZD8</i>     |
| <i>MTAP</i>     | <i>MMP16</i>   | <i>E2F3</i>     | <i>Sla</i>     |                  | <i>SERPINE1</i> | <i>LDHB</i>     |
| <i>DOCK7</i>    | <i>RDX</i>     | <i>DDAH1</i>    | <i>Hif1a</i>   |                  | <i>ITGB8</i>    | <i>YWHAZ</i>    |
| <i>DOCK5</i>    | <i>CXCL12</i>  | <i>MNT</i>      | <i>Csf1r</i>   |                  | <i>VAV2</i>     | <i>KIAA1524</i> |
| <i>RECK</i>     | <i>ARPC5</i>   | <i>AIFM3</i>    | <i>Jarid2</i>  |                  | <i>ITGA5</i>    | <i>TP53</i>     |
| <i>PIAS3</i>    | <i>FZD3</i>    | <i>VMP1</i>     | <i>Cebpb</i>   |                  | <i>ROCK1</i>    | <i>ERBB2</i>    |
| <i>TGFBR2</i>   | <i>DMD</i>     | <i>TFRC</i>     | <i>Picalm</i>  |                  | <i>SMAD2</i>    | <i>IGF1R</i>    |
| <i>PTEN</i>     | <i>TIAM1</i>   | <i>HSD17B1</i>  | <i>CSNK1A1</i> |                  | <i>MET</i>      | <i>PIK3CA</i>   |
| <i>E2F1</i>     | <i>ICAM1</i>   | <i>NDUFA4</i>   | <i>APC</i>     |                  | <i>BCL2L11</i>  | <i>PHLPP1</i>   |
| <i>TGFBI</i>    | <i>DKK1</i>    | <i>SDHD</i>     | <i>TRIP13</i>  |                  | <i>MAFB</i>     | <i>RHOA</i>     |
| <i>LRRFIP1</i>  | <i>DACT3</i>   | <i>STMN1</i>    | <i>TBCA</i>    |                  | <i>ERRFI1</i>   | <i>KCNQ2</i>    |
| <i>MARCKS</i>   | <i>PRKCE</i>   | <i>DIMT1L</i>   | <i>SMAD1</i>   |                  | <i>S1PR1</i>    | <i>TIMM8A</i>   |
| <i>SP1</i>      | <i>RASA1</i>   | <i>ALDH5A1</i>  | <i>SDCBP</i>   |                  | <i>USP4</i>     | <i>BCL2L11</i>  |
| <i>CCL20</i>    | <i>STK40</i>   | <i>FOXN3</i>    | <i>RHEB</i>    |                  | <i>DNMT1</i>    | <i>RAB10</i>    |
| <i>TPM1</i>     | <i>MCM2</i>    | <i>MCM3</i>     | <i>POLE3</i>   |                  | <i>RUNX3</i>    | <i>PARP1</i>    |
| <i>NFIB</i>     | <i>CDK1</i>    | <i>IGFBP3</i>   | <i>PKN2</i>    |                  | <i>MYC</i>      | <i>CAB39</i>    |
| <i>APAF1</i>    | <i>CREG1</i>   | <i>COL4A2</i>   | <i>PHC2</i>    |                  |                 | <i>DLG4</i>     |
| <i>BTG2</i>     | <i>MLH1</i>    | <i>INPP5A</i>   | <i>NARS</i>    |                  |                 | <i>ITGB1</i>    |
| <i>PDCD4</i>    | <i>MET</i>     | <i>EHD2</i>     | <i>MYO10</i>   |                  |                 | <i>SETD8</i>    |
| <i>RHOB</i>     | <i>SRC</i>     | <i>SH3BGRL</i>  | <i>DHX40</i>   |                  |                 | <i>CASP3</i>    |
| <i>ANP32A</i>   | <i>MAP4K4</i>  | <i>PTPN2</i>    | <i>CLDN1</i>   |                  |                 | <i>CDC42</i>    |
| <i>SERPINB5</i> | <i>RAB27A</i>  | <i>LDHA</i>     | <i>ARID2</i>   |                  |                 | <i>EIF2AK2</i>  |
| <i>BMPR2</i>    | <i>TBXA2R</i>  | <i>LDHB</i>     | <i>ARFIP1</i>  |                  |                 | <i>BCL2</i>     |

|                 |                 |                 |                 |  |  |                 |
|-----------------|-----------------|-----------------|-----------------|--|--|-----------------|
| <i>RASA1</i>    | <i>C11orf30</i> | <i>FOXP3</i>    | <i>TM6SF1</i>   |  |  | <i>NCAM1</i>    |
| <i>NCOA3</i>    | <i>ARID1A</i>   | <i>HIF3A</i>    | <i>MATR3</i>    |  |  | <i>LEPROTL1</i> |
| <i>PCBP1</i>    | <i>ABCB9</i>    | <i>BNIP3</i>    | <i>LDOC1</i>    |  |  |                 |
| <i>JMY</i>      | <i>RHOBTB1</i>  | <i>KCMF1</i>    | <i>PHF17</i>    |  |  |                 |
| <i>TOPORS</i>   | <i>SP7</i>      | <i>P4HB</i>     | <i>RHOA</i>     |  |  |                 |
| <i>HNRNPK</i>   | <i>HIF1AN</i>   | <i>MRE11A</i>   | <i>AGTR1</i>    |  |  |                 |
| <i>DAXX</i>     | <i>RHOA</i>     | <i>XPA</i>      | <i>PKIA</i>     |  |  |                 |
| <i>TP53BP2</i>  | <i>SELE</i>     | <i>ROD1</i>     | <i>RNF123</i>   |  |  |                 |
| <i>TP63</i>     |                 | <i>HIF1A</i>    | <i>TP53INP1</i> |  |  |                 |
| <i>TGFBR3</i>   |                 | <i>SMCHD1</i>   | <i>IKBKE</i>    |  |  |                 |
| <i>PPIF</i>     |                 | <i>TNPO1</i>    | <i>FGF7</i>     |  |  |                 |
| <i>MSH2</i>     |                 | <i>CBX1</i>     | <i>KDM3A</i>    |  |  |                 |
| <i>MSH6</i>     |                 | <i>ABCB9</i>    | <i>NFATC2IP</i> |  |  |                 |
| <i>TIAM1</i>    |                 | <i>CDK10</i>    | <i>SPI1</i>     |  |  |                 |
| <i>ISCU</i>     |                 | <i>DENND6A</i>  | <i>Cux1</i>     |  |  |                 |
| <i>MEF2C</i>    |                 | <i>HOXA3</i>    | <i>Sfpi1</i>    |  |  |                 |
| <i>EIF4A2</i>   |                 | <i>KIAA1161</i> | <i>EDN1</i>     |  |  |                 |
| <i>ANKRD46</i>  |                 | <i>MDGA1</i>    | <i>FOXO3</i>    |  |  |                 |
| <i>EGFR</i>     |                 | <i>MID1IP1</i>  | <i>MAFB</i>     |  |  |                 |
| <i>IL1B</i>     |                 | <i>SEH1L</i>    | <i>TSHZ3</i>    |  |  |                 |
| <i>ICAM1</i>    |                 | <i>UBQLN1</i>   | <i>RUNX2</i>    |  |  |                 |
| <i>PLAT</i>     |                 | <i>SERTAD2</i>  | <i>JUN</i>      |  |  |                 |
| <i>PTX3</i>     |                 | <i>ACVR1B</i>   | <i>IFNGR1</i>   |  |  |                 |
| <i>TNFAIP3</i>  |                 | <i>APC</i>      | <i>KBTBD2</i>   |  |  |                 |
| <i>CCR1</i>     |                 | <i>ATP11C</i>   | <i>KRAS</i>     |  |  |                 |
| <i>CDK2AP1</i>  |                 | <i>CHD9</i>     | <i>ETS1</i>     |  |  |                 |
| <i>DOCK4</i>    |                 | <i>CLASP2</i>   | <i>TLE4</i>     |  |  |                 |
| <i>PPARA</i>    |                 | <i>ELK3</i>     | <i>CYR61</i>    |  |  |                 |
| <i>NTF3</i>     |                 | <i>PTAR1</i>    | <i>ICAM1</i>    |  |  |                 |
| <i>COL4A1</i>   |                 | <i>NIPBL</i>    | <i>SELE</i>     |  |  |                 |
| <i>FASLG</i>    |                 | <i>MIB1</i>     | <i>SMAD2</i>    |  |  |                 |
| <i>SOD3</i>     |                 | <i>HECTD1</i>   | <i>MYB</i>      |  |  |                 |
| <i>TCF21</i>    |                 |                 | <i>SKI</i>      |  |  |                 |
| <i>SMAD7</i>    |                 |                 | <i>GCSAM</i>    |  |  |                 |
| <i>SERPINI1</i> |                 |                 | <i>CKAP5</i>    |  |  |                 |
| <i>BCL6</i>     |                 |                 | <i>SOX6</i>     |  |  |                 |
| <i>SMN1</i>     |                 |                 | <i>IL13RA1</i>  |  |  |                 |
| <i>HPGD</i>     |                 |                 | <i>FADD</i>     |  |  |                 |
| <i>MYD88</i>    |                 |                 | <i>BCL6</i>     |  |  |                 |
| <i>IRAK1</i>    |                 |                 | <i>MITF</i>     |  |  |                 |
| <i>VHL</i>      |                 |                 | <i>MAP3K10</i>  |  |  |                 |

|           |  |  |          |  |  |  |
|-----------|--|--|----------|--|--|--|
| GDF5      |  |  | NOS3     |  |  |  |
| MAP2K3    |  |  | ANAPC16  |  |  |  |
| SETD2     |  |  | C17orf80 |  |  |  |
| CLU       |  |  | MYLK     |  |  |  |
| TNFRSF10B |  |  | PSIP1    |  |  |  |
| IGF1R     |  |  | GCFC2    |  |  |  |
| RPS7      |  |  | EXOSC2   |  |  |  |
| FMOD      |  |  | LNX2     |  |  |  |
| TGIF1     |  |  | ZNF248   |  |  |  |
| ERBB2     |  |  | CHD9     |  |  |  |
| VEGFA     |  |  | MEF2A    |  |  |  |
| AKT2      |  |  | CAB39    |  |  |  |
| YOD1      |  |  | CLUAP1   |  |  |  |
| STAT3     |  |  | CARD11   |  |  |  |
| SATB1     |  |  | PCDH9    |  |  |  |
| WWP1      |  |  | ZNF561   |  |  |  |
| NFIA      |  |  | CARHSP1  |  |  |  |
| SIRT2     |  |  | C16orf62 |  |  |  |
| GAS5      |  |  | LIN7C    |  |  |  |
| RHO       |  |  | CBR4     |  |  |  |
| E2F2      |  |  | GPM6B    |  |  |  |
| HIPK3     |  |  | LRIF1    |  |  |  |
| MYC       |  |  | TAF5L    |  |  |  |
| SOX2      |  |  | HERC4    |  |  |  |
| RMND5A    |  |  | MORC3    |  |  |  |
| MMP2      |  |  | MBNL3    |  |  |  |
| SASH1     |  |  | UPF2     |  |  |  |
| MMP9      |  |  | TSPAN14  |  |  |  |
| ELAVL4    |  |  | INTS6    |  |  |  |
| TOR1AIP2  |  |  | YWHAZ    |  |  |  |
| PELI1     |  |  | PRKAR1A  |  |  |  |
| IL12A     |  |  | SSX2IP   |  |  |  |
| SECISBP2L |  |  | FAM199X  |  |  |  |
| RFFL      |  |  | RAC1     |  |  |  |
| CXCL10    |  |  | PLS1     |  |  |  |
|           |  |  | SAP30L   |  |  |  |
|           |  |  | MRPS27   |  |  |  |
|           |  |  | CEP41    |  |  |  |
|           |  |  | CIAPIN1  |  |  |  |
|           |  |  | CCDC82   |  |  |  |
|           |  |  | ACTR2    |  |  |  |

|  |  |  |                  |  |  |  |
|--|--|--|------------------|--|--|--|
|  |  |  | <i>TRAK1</i>     |  |  |  |
|  |  |  | <i>CYP2U1</i>    |  |  |  |
|  |  |  | <i>SLC35F2</i>   |  |  |  |
|  |  |  | <i>ZNF493</i>    |  |  |  |
|  |  |  | <i>HAL</i>       |  |  |  |
|  |  |  | <i>IL17RB</i>    |  |  |  |
|  |  |  | <i>TBC1D14</i>   |  |  |  |
|  |  |  | <i>ZNF254</i>    |  |  |  |
|  |  |  | <i>GABARAPL1</i> |  |  |  |
|  |  |  | <i>IGJ</i>       |  |  |  |
|  |  |  | <i>RAPGEF2</i>   |  |  |  |
|  |  |  | <i>WBP1L</i>     |  |  |  |
|  |  |  | <i>PBRM1</i>     |  |  |  |
|  |  |  | <i>MRPL18</i>    |  |  |  |
|  |  |  | <i>MAP3K14</i>   |  |  |  |
|  |  |  | <i>ARMC2</i>     |  |  |  |
|  |  |  | <i>LCORL</i>     |  |  |  |
|  |  |  | <i>APAF1</i>     |  |  |  |
|  |  |  | <i>MPP5</i>      |  |  |  |
|  |  |  | <i>RAB11FIP2</i> |  |  |  |
|  |  |  | <i>NOVA1</i>     |  |  |  |
|  |  |  | <i>RBAK</i>      |  |  |  |
|  |  |  | <i>ARL15</i>     |  |  |  |
|  |  |  | <i>MYO1D</i>     |  |  |  |
|  |  |  | <i>LRRC59</i>    |  |  |  |
|  |  |  | <i>ANXA2</i>     |  |  |  |
|  |  |  | <i>TTF1</i>      |  |  |  |
|  |  |  | <i>FAM91A1</i>   |  |  |  |
|  |  |  | <i>CCDC41</i>    |  |  |  |
|  |  |  | <i>KIAA0430</i>  |  |  |  |
|  |  |  | <i>CDC40</i>     |  |  |  |
|  |  |  | <i>DCUN1D2</i>   |  |  |  |
|  |  |  | <i>KLHL5</i>     |  |  |  |
|  |  |  | <i>AGO4</i>      |  |  |  |
|  |  |  | <i>HBP1</i>      |  |  |  |
|  |  |  | <i>WWC1</i>      |  |  |  |
|  |  |  | <i>WEE1</i>      |  |  |  |
|  |  |  | <i>GOLT1B</i>    |  |  |  |
|  |  |  | <i>PALD1</i>     |  |  |  |
|  |  |  | <i>CCND1</i>     |  |  |  |
|  |  |  | <i>ZNF83</i>     |  |  |  |

|  |  |  |                 |  |  |  |
|--|--|--|-----------------|--|--|--|
|  |  |  | <i>PHF14</i>    |  |  |  |
|  |  |  | <i>TBC1D8B</i>  |  |  |  |
|  |  |  | <i>INPP5F</i>   |  |  |  |
|  |  |  | <i>ARPC3</i>    |  |  |  |
|  |  |  | <i>KRCC1</i>    |  |  |  |
|  |  |  | <i>FAM177A1</i> |  |  |  |
|  |  |  | <i>UBTD2</i>    |  |  |  |
|  |  |  | <i>SECISBP2</i> |  |  |  |
|  |  |  | <i>PAK2</i>     |  |  |  |
|  |  |  | <i>SLC33A1</i>  |  |  |  |
|  |  |  | <i>ZNF28</i>    |  |  |  |
|  |  |  | <i>MCM8</i>     |  |  |  |
|  |  |  | <i>SMARCA4</i>  |  |  |  |
|  |  |  | <i>TCF12</i>    |  |  |  |
|  |  |  | <i>TOMM20</i>   |  |  |  |
|  |  |  | <i>UBQLN1</i>   |  |  |  |
|  |  |  | <i>VPS18</i>    |  |  |  |
|  |  |  | <i>WHSC1L1</i>  |  |  |  |
|  |  |  | <i>MASTL</i>    |  |  |  |
|  |  |  | <i>MYBL1</i>    |  |  |  |
|  |  |  | <i>GATM</i>     |  |  |  |
|  |  |  | <i>E2F2</i>     |  |  |  |
|  |  |  | <i>FAM135A</i>  |  |  |  |
|  |  |  | <i>C3orf18</i>  |  |  |  |
|  |  |  | <i>ARL6IP5</i>  |  |  |  |
|  |  |  | <i>SHANK2</i>   |  |  |  |
|  |  |  | <i>SH3PXD2A</i> |  |  |  |
|  |  |  | <i>PIK3R1</i>   |  |  |  |
|  |  |  | <i>VHL</i>      |  |  |  |
|  |  |  | <i>MMP16</i>    |  |  |  |
|  |  |  | <i>MYC</i>      |  |  |  |
|  |  |  | <i>SEL1L</i>    |  |  |  |
|  |  |  | <i>DOCK1</i>    |  |  |  |
|  |  |  | <i>RAD51</i>    |  |  |  |
|  |  |  | <i>THRB</i>     |  |  |  |
|  |  |  | <i>TERF1</i>    |  |  |  |
|  |  |  | <i>MXI1</i>     |  |  |  |
|  |  |  | <i>UQCRFS1</i>  |  |  |  |
|  |  |  | <i>PDLIM5</i>   |  |  |  |
|  |  |  | <i>MSI2</i>     |  |  |  |
|  |  |  | <i>BRPF3</i>    |  |  |  |

|  |  |  |                |  |  |  |
|--|--|--|----------------|--|--|--|
|  |  |  | <i>FLI1</i>    |  |  |  |
|  |  |  | <i>MYD88</i>   |  |  |  |
|  |  |  | <i>NKX3-1</i>  |  |  |  |
|  |  |  | <i>OLR1</i>    |  |  |  |
|  |  |  | <i>SMAD4</i>   |  |  |  |
|  |  |  | <i>CD68</i>    |  |  |  |
|  |  |  | <i>SMAD3</i>   |  |  |  |
|  |  |  | <i>IL8</i>     |  |  |  |
|  |  |  | <i>ZNF611</i>  |  |  |  |
|  |  |  | <i>TRIM32</i>  |  |  |  |
|  |  |  | <i>PPL</i>     |  |  |  |
|  |  |  | <i>DNAJC19</i> |  |  |  |
|  |  |  | <i>TWF1</i>    |  |  |  |
|  |  |  | <i>FLT1</i>    |  |  |  |
|  |  |  | <i>VCAM1</i>   |  |  |  |
|  |  |  | <i>INADL</i>   |  |  |  |
|  |  |  | <i>ITK</i>     |  |  |  |
|  |  |  | <i>IL2</i>     |  |  |  |
|  |  |  | <i>ZNF431</i>  |  |  |  |
|  |  |  | <i>WNK1</i>    |  |  |  |
|  |  |  | <i>ZNF714</i>  |  |  |  |
|  |  |  | <i>ETNK2</i>   |  |  |  |
|  |  |  | <i>TRPS1</i>   |  |  |  |
|  |  |  | <i>PEA15</i>   |  |  |  |
|  |  |  | <i>PTN</i>     |  |  |  |
|  |  |  | <i>SOCS3</i>   |  |  |  |

**Table S4 The combinatorial effect of 7 miRNAs in KEGG pathways**

| #  | KEGG pathway                                           | FDR      | #Targets |
|----|--------------------------------------------------------|----------|----------|
| 1  | Colorectal cancer                                      | 5.14E-18 | 22       |
| 2  | Pathways in cancer                                     | 1.51E-16 | 64       |
| 3  | Hepatitis B                                            | 2.74E-13 | 33       |
| 4  | Prion diseases                                         | 1.97E-12 | 3        |
| 5  | Pancreatic cancer                                      | 9.12E-12 | 22       |
| 6  | Bladder cancer                                         | 2.05E-08 | 13       |
| 7  | Endometrial cancer                                     | 3.51E-08 | 14       |
| 8  | p53 signaling pathway                                  | 3.65E-08 | 18       |
| 9  | Protein processing in endoplasmic reticulum            | 4.67E-08 | 34       |
| 10 | RNA transport                                          | 7.75E-08 | 31       |
| 11 | Adherens junction                                      | 2.22E-07 | 18       |
| 12 | Prostate cancer                                        | 8.49E-07 | 20       |
| 13 | TGF-beta signaling pathway                             | 1.06E-06 | 14       |
| 14 | mTOR signaling pathway                                 | 1.68E-06 | 16       |
| 15 | Glycosaminoglycan biosynthesis - chondroitin sulfate   | 9.11E-06 | 3        |
| 16 | Small cell lung cancer                                 | 9.11E-06 | 18       |
| 17 | Non-small cell lung cancer                             | 6.53E-05 | 13       |
| 18 | Focal adhesion                                         | 1.39E-04 | 32       |
| 19 | PI3K-Akt signaling pathway                             | 1.70E-04 | 49       |
| 20 | Arrhythmogenic right ventricular cardiomyopathy (ARVC) | 1.89E-04 | 13       |
| 21 | Melanoma                                               | 3.12E-04 | 14       |
| 22 | Chronic myeloid leukemia                               | 3.34E-04 | 15       |
| 23 | Apoptosis                                              | 1.21E-03 | 16       |
| 24 | Insulin signaling pathway                              | 1.49E-03 | 22       |
| 25 | Steroid biosynthesis                                   | 2.15E-03 | 4        |
| 26 | Sphingolipid metabolism                                | 2.15E-03 | 11       |
| 27 | Malaria                                                | 2.36E-03 | 10       |
| 28 | Regulation of actin cytoskeleton                       | 3.96E-03 | 32       |
| 29 | Cell cycle                                             | 4.22E-03 | 23       |
| 30 | Viral myocarditis                                      | 5.98E-03 | 12       |
| 31 | Axon guidance                                          | 8.45E-03 | 19       |
| 32 | B cell receptor signaling pathway                      | 9.21E-03 | 13       |
| 33 | Lysine degradation                                     | 1.07E-02 | 10       |
| 34 | Ubiquitin mediated proteolysis                         | 1.28E-02 | 21       |
| 35 | Synthesis and degradation of ketone bodies             | 1.31E-02 | 3        |
| 36 | Bacterial invasion of epithelial cells                 | 1.31E-02 | 12       |
| 37 | Salmonella infection                                   | 1.31E-02 | 14       |
| 38 | African trypanosomiasis                                | 1.31E-02 | 7        |
| 39 | Wnt signaling pathway                                  | 1.31E-02 | 23       |
| 40 | MAPK signaling pathway                                 | 1.31E-02 | 35       |

|    |                                           |          |    |
|----|-------------------------------------------|----------|----|
| 41 | HTLV-I infection                          | 1.31E-02 | 37 |
| 42 | Herpes simplex infection                  | 1.50E-02 | 30 |
| 43 | Hepatitis C                               | 1.73E-02 | 19 |
| 44 | Mismatch repair                           | 2.11E-02 | 4  |
| 45 | Acute myeloid leukemia                    | 2.16E-02 | 9  |
| 46 | SNARE interactions in vesicular transport | 2.49E-02 | 7  |
| 47 | Butanoate metabolism                      | 2.69E-02 | 6  |
| 48 | Fc gamma R-mediated phagocytosis          | 2.69E-02 | 14 |
| 49 | HIF-1 signaling pathway                   | 3.73E-02 | 17 |
| 50 | Pathogenic Escherichia coli infection     | 4.38E-02 | 9  |

---



**Table S5 Characteristics of diagnostic clinical trials included in the meta-analysis**

| Author (year)   | Ethnicity | Country | Sample size |         | Sample source   | Diagnostic tests |       |
|-----------------|-----------|---------|-------------|---------|-----------------|------------------|-------|
|                 |           |         | Case        | Control |                 | Sens             | Spec  |
| Wang (2009)     | Caucasian | US      | 28          | 19      | Blood           | 46.0             | 89.0  |
| Sadakari (2010) | Asian     | Japan   | 12          | 3       | Digestive juice | 91.7             | 100.0 |
| Ryu (2011)      | Asian     | Korea   | 24          | 16      | Digestive juice | 76.0             | 80.0  |
| Liu (2011)a     | Asian     | China   | 45          | 45      | Blood           | 66.7             | 71.1  |
| Liu (2011)b     | Asian     | China   | 45          | 30      | Blood           | 77.8             | 66.7  |
| Que (2013)      | Asian     | China   | 22          | 27      | Blood           | 95.5             | 81.5  |
| Abue (2014)a    | Asian     | Japan   | 32          | 30      | Blood           | 75.0             | 73.0  |
| Abue (2014)b    | Asian     | Japan   | 32          | 42      | Blood           | 80.0             | 63.0  |
| Humeau (2015)   | Caucasian | France  | 7           | 4       | Saliva          | 71.4             | 100.0 |

a. Patients with non-tumor benign disease as control; b. Healthy volunteer as control.
